# Supplementary material for: Parental exposures to occupational asthmagens and risk of autism spectrum disorder in a Danish population-based case-control study
Source: PubMed Central journal article supplement (PMC5374665; doi:10.1186/s12940-017-0230-8), 2017-03-31
Supplement: 12940_2017_230_MOESM1_ESM.pdf [file 12940_2017_230_MOESM1_ESM.pdf]

**Appendix. Parental exposures to occupational asthmagens and risk of autism spectrum disorder in a Danish population-based case-control study.**

**Supplemental Table 1: Parent and child characteristics by maternal occupational asthmagen exposure within 29,359 controls and 6,706 cases.**

|                                      | Control |      |                | ASD  |     |                |
|--------------------------------------|---------|------|----------------|------|-----|----------------|
|                                      | No      | Yes  |                | No   | Yes |                |
|                                      | N       | N    | % <sup>a</sup> | N    | N   | % <sup>a</sup> |
| <b>Child's Sex</b>                   |         |      |                |      |     |                |
| Male                                 | 12019   | 2946 | 19.7           | 4275 | 982 | 18.7           |
| Female                               | 11464   | 2930 | 20.4           | 1184 | 265 | 18.3           |
| <b>Child's Year of Birth</b>         |         |      |                |      |     |                |
| 1993-1997                            | 7504    | 2428 | 24.4           | 2109 | 610 | 22.4           |
| 1998-2002                            | 8200    | 1778 | 17.8           | 2262 | 407 | 15.2           |
| 2003-2007                            | 7779    | 1670 | 17.7           | 1088 | 230 | 17.5           |
| <b>Parity</b>                        |         |      |                |      |     |                |
| 1                                    | 11015   | 2551 | 18.8           | 2977 | 640 | 17.7           |
| 2                                    | 8868    | 2202 | 19.9           | 1828 | 411 | 18.4           |
| ≥3                                   | 3600    | 1123 | 23.8           | 654  | 196 | 23.1           |
| <b>Maternal Age at Child's Birth</b> |         |      |                |      |     |                |
| ≤25 years                            | 3325    | 940  | 22.0           | 910  | 240 | 20.9           |
| 26-30 years                          | 9596    | 2466 | 20.4           | 2152 | 488 | 18.5           |
| 31-35 years                          | 7801    | 1859 | 19.2           | 1696 | 373 | 18.0           |
| ≥36 years                            | 2761    | 611  | 18.1           | 701  | 146 | 17.2           |
| <b>Total Parental Income</b>         |         |      |                |      |     |                |
| <200,000 DKK                         | 393     | 88   | 18.3           | 146  | 33  | 18.4           |
| 200,000-399,999 DKK                  | 5522    | 1764 | 24.2           | 1666 | 463 | 21.7           |
| 400,000-599,999 DKK                  | 11511   | 2877 | 20.0           | 2567 | 583 | 18.5           |
| ≥600,000 DKK                         | 6057    | 1147 | 15.9           | 1080 | 168 | 13.5           |
| <b>Highest Parental Education</b>    |         |      |                |      |     |                |
| Basic School                         | 1119    | 448  | 28.6           | 387  | 132 | 25.4           |
| Upper Secondary School               | 1085    | 175  | 13.9           | 309  | 60  | 16.3           |
| Vocational School                    | 10076   | 2509 | 19.9           | 2335 | 533 | 18.6           |
| Higher Education                     | 11203   | 2744 | 19.7           | 2428 | 522 | 17.7           |

|                                |       |      |      |      |      |      |
|--------------------------------|-------|------|------|------|------|------|
| Parental Psychiatric Diagnosis |       |      |      |      |      |      |
| No                             | 22444 | 5614 | 20.0 | 5044 | 1166 | 18.8 |
| Yes                            | 1039  | 262  | 20.1 | 415  | 81   | 16.3 |
| Urbanicity                     |       |      |      |      |      |      |
| Capital                        | 3331  | 603  | 15.3 | 1079 | 179  | 14.2 |
| Capital Suburb                 | 3333  | 709  | 17.5 | 1071 | 199  | 15.7 |
| Provincial Cities              | 2793  | 698  | 20.0 | 531  | 139  | 20.7 |
| Provincial Towns               | 6276  | 1672 | 21.0 | 1340 | 347  | 20.6 |
| Rural Area                     | 7750  | 2194 | 22.1 | 1438 | 383  | 21.0 |
| Maternal Immigrant Status      |       |      |      |      |      |      |
| No                             | 22262 | 5460 | 19.7 | 5165 | 1161 | 18.4 |
| Yes                            | 1221  | 416  | 25.4 | 294  | 86   | 22.6 |
| Maternal Pregnancy Smoking     |       |      |      |      |      |      |
| No                             | 19128 | 4622 | 19.5 | 4142 | 919  | 18.2 |
| Yes                            | 4355  | 1254 | 22.4 | 1317 | 328  | 19.9 |

---

<sup>a</sup> Percent exposed.

**Supplemental Table 2: Parent and child characteristics by paternal occupational asthmagen exposure within 31,947 controls and 7,647 cases.**

|                                      | Control |      |                | ASD  |      |                |
|--------------------------------------|---------|------|----------------|------|------|----------------|
|                                      | No      | Yes  |                | No   | Yes  |                |
|                                      | N       | N    | % <sup>a</sup> | N    | N    | % <sup>a</sup> |
| <b>Child's Sex</b>                   |         |      |                |      |      |                |
| Male                                 | 12888   | 3387 | 20.8           | 4778 | 1227 | 20.4           |
| Female                               | 12284   | 3388 | 21.6           | 1308 | 334  | 20.3           |
| <b>Child's Year of Birth</b>         |         |      |                |      |      |                |
| 1993-1997                            | 8373    | 2744 | 24.7           | 2464 | 748  | 23.3           |
| 1998-2002                            | 8673    | 2259 | 20.7           | 2416 | 579  | 19.3           |
| 2003-2007                            | 8126    | 1772 | 17.9           | 1206 | 234  | 16.3           |
| <b>Parity</b>                        |         |      |                |      |      |                |
| 1                                    | 11128   | 2805 | 20.1           | 3136 | 765  | 19.6           |
| 2                                    | 9855    | 2529 | 20.4           | 2127 | 541  | 20.3           |
| ≥3                                   | 4189    | 1441 | 25.6           | 823  | 255  | 23.7           |
| <b>Paternal Age at Child's Birth</b> |         |      |                |      |      |                |
| ≤25 years                            | 1871    | 779  | 29.4           | 535  | 199  | 27.1           |
| 26-30 years                          | 7727    | 2275 | 22.7           | 1849 | 509  | 21.6           |
| 31-35 years                          | 9214    | 2258 | 19.7           | 2013 | 512  | 20.3           |
| ≥36 years                            | 6360    | 1463 | 18.7           | 1689 | 341  | 16.8           |
| <b>Total Parental Income</b>         |         |      |                |      |      |                |
| <200,000 DKK                         | 606     | 163  | 21.2           | 179  | 53   | 22.8           |
| 200,000-399,999 DKK                  | 6459    | 2503 | 27.9           | 2020 | 714  | 26.1           |
| 400,000-599,999 DKK                  | 11729   | 3216 | 21.5           | 2732 | 672  | 19.7           |
| ≥600,000 DKK                         | 6378    | 893  | 12.3           | 1155 | 122  | 9.6            |
| <b>Highest Parental Education</b>    |         |      |                |      |      |                |
| Basic School                         | 1684    | 648  | 27.8           | 553  | 197  | 26.3           |
| Upper Secondary School               | 1237    | 232  | 15.8           | 378  | 70   | 15.6           |
| Vocational School                    | 9981    | 4021 | 28.7           | 2442 | 888  | 26.7           |
| Higher Education                     | 12270   | 1874 | 13.2           | 2713 | 406  | 13.0           |

|                                |       |      |      |      |      |      |
|--------------------------------|-------|------|------|------|------|------|
| Parental Psychiatric Diagnosis |       |      |      |      |      |      |
| No                             | 23921 | 6459 | 21.3 | 5615 | 1443 | 20.4 |
| Yes                            | 1251  | 316  | 20.2 | 471  | 118  | 20.0 |
| Urbanicity                     |       |      |      |      |      |      |
| Capital                        | 3646  | 460  | 11.2 | 1234 | 171  | 12.2 |
| Capital Suburb                 | 3687  | 626  | 14.5 | 1158 | 177  | 13.3 |
| Provincial Cities              | 3120  | 600  | 16.1 | 619  | 130  | 17.4 |
| Provincial Towns               | 6882  | 1848 | 21.2 | 1522 | 441  | 22.5 |
| Rural Area                     | 7837  | 3241 | 29.3 | 1553 | 642  | 29.2 |
| Paternal Immigrant Status      |       |      |      |      |      |      |
| No                             | 23393 | 6232 | 21.0 | 5702 | 1448 | 20.3 |
| Yes                            | 1779  | 543  | 23.4 | 384  | 113  | 22.7 |
| Maternal Pregnancy Smoking     |       |      |      |      |      |      |
| No                             | 20318 | 5115 | 20.1 | 4577 | 1088 | 19.2 |
| Yes                            | 4854  | 1660 | 25.5 | 1509 | 473  | 23.9 |

---

<sup>a</sup> Percent exposed.

**Supplemental Table 3: Associations between maternal occupational exposure to asthmagens during pregnancy and ASD (29,359 controls and 6,706 ASD cases).**

|                      | Control | ASD     | Crude |                     | Adjusted |                     |
|----------------------|---------|---------|-------|---------------------|----------|---------------------|
|                      | Exposed | Exposed | OR    | 95% CI <sup>b</sup> | OR       | 95% CI <sup>b</sup> |
|                      | N       | N       |       |                     |          |                     |
| Any Asthmagen        | 5876    | 1247    | 0.91  | 0.85 - 0.98         | 0.92     | 0.86 - 0.99         |
| Any HMW <sup>c</sup> | 4219    | 879     | 0.90  | 0.83 - 0.97         | 0.93     | 0.86 - 1.01         |
| Animals              | 258     | 58      | 0.98  | 0.74 - 1.31         | 1.00     | 0.74 - 1.35         |
| Fish                 | 124     | 33      | 1.17  | 0.79 - 1.71         | 0.98     | 0.65 - 1.47         |
| Flour                | 70      | 19      | 1.19  | 0.72 - 1.98         | 1.18     | 0.69 - 2.01         |
| Plants               | 10      | 4       | 1.76  | 0.55 - 5.59         | 1.49     | 0.45 - 4.94         |
| Mites                | 16      | 5       | 1.37  | 0.50 - 3.74         | 1.42     | 0.50 - 4.03         |
| Enzymes              | 47      | 15      | 1.40  | 0.78 - 2.50         | 1.38     | 0.75 - 2.55         |
| Latex                | 3309    | 679     | 0.89  | 0.81 - 0.97         | 0.90     | 0.82 - 0.98         |
| Bioaerosols          | 194     | 44      | 0.99  | 0.72 - 1.38         | 1.22     | 0.86 - 1.72         |
| Drugs                | 393     | 79      | 0.88  | 0.69 - 1.12         | 1.01     | 0.79 - 1.31         |
| Any LMW <sup>d</sup> | 2970    | 709     | 1.05  | 0.96 - 1.15         | 0.99     | 0.90 - 1.08         |
| Reactive             | 2271    | 508     | 0.98  | 0.88 - 1.08         | 0.93     | 0.83 - 1.03         |
| Isocyanate           | 45      | 12      | 1.17  | 0.62 - 2.21         | 1.29     | 0.66 - 2.54         |
| Cleaning             | 1834    | 488     | 1.18  | 1.06 - 1.31         | 1.04     | 0.93 - 1.16         |
| Wood                 | 44      | 11      | 1.10  | 0.57 - 2.12         | 1.26     | 0.63 - 2.52         |
| Metals               | 335     | 80      | 1.05  | 0.82 - 1.34         | 1.14     | 0.89 - 1.48         |
| Any Mixed            | 491     | 110     | 0.98  | 0.80 - 1.21         | 1.03     | 0.83 - 1.28         |
| Metalworking         | 78      | 24      | 1.35  | 0.85 - 2.13         | 1.50     | 0.93 - 2.44         |
| Textile              | 168     | 36      | 0.94  | 0.65 - 1.35         | 0.80     | 0.55 - 1.17         |
| Agricultural         | 245     | 50      | 0.89  | 0.66 - 1.21         | 1.07     | 0.78 - 1.48         |
| Irritant Peaks       | 69      | 11      | 0.70  | 0.37 - 1.32         | 0.75     | 0.39 - 1.45         |

<sup>a</sup> Adjusted for child's year of birth, child's sex, maternal age at birth, paternal age of birth, total income of parents, parity, highest parental education, history of parental psychiatric diagnosis prior to child's date of birth, urbanicity of birth place, maternal immigrant status, and maternal smoking. <sup>b</sup> 95% CI= 95% confidence interval. <sup>c</sup> HMW = High Molecular Weight. <sup>d</sup> LMW = Low Molecular Weight.

**Supplemental Table 4: Associations between paternal occupational exposure to asthmagens during pregnancy and ASD (31,947 controls and 7,647 ASD cases).**

|                      | Control |         | ASD  |                     | Crude |                     | Adjusted |  |
|----------------------|---------|---------|------|---------------------|-------|---------------------|----------|--|
|                      | Exposed | Exposed | OR   | 95% CI <sup>b</sup> | OR    | 95% CI <sup>b</sup> |          |  |
|                      | N       | N       |      |                     |       |                     |          |  |
| Any Asthmagen        | 6775    | 1561    | 0.95 | 0.90 - 1.01         | 0.98  | 0.92 - 1.05         |          |  |
| Any HMW <sup>c</sup> | 1986    | 535     | 1.13 | 1.03 - 1.25         | 1.14  | 1.02 - 1.26         |          |  |
| Animals              | 647     | 135     | 0.87 | 0.72 - 1.05         | 0.96  | 0.79 - 1.17         |          |  |
| Fish                 | 162     | 47      | 1.21 | 0.88 - 1.68         | 1.20  | 0.85 - 1.68         |          |  |
| Flour                | 152     | 38      | 1.05 | 0.73 - 1.49         | 1.03  | 0.71 - 1.50         |          |  |
| Plants               | 26      | 7       | 1.13 | 0.49 - 2.60         | 1.25  | 0.52 - 2.98         |          |  |
| Mites                | 9       | 0       | .    | .                   | .     | .                   |          |  |
| Enzymes              | 124     | 29      | 0.98 | 0.65 - 1.47         | 0.99  | 0.65 - 1.51         |          |  |
| Latex                | 367     | 117     | 1.34 | 1.08 - 1.65         | 1.12  | 0.90 - 1.40         |          |  |
| Bioaerosols          | 835     | 226     | 1.13 | 0.98 - 1.32         | 1.21  | 1.03 - 1.41         |          |  |
| Drugs                | 54      | 21      | 1.63 | 0.98 - 2.70         | 1.75  | 1.03 - 2.97         |          |  |
| Any LMW <sup>d</sup> | 4249    | 1063    | 1.05 | 0.98 - 1.13         | 1.04  | 0.96 - 1.12         |          |  |
| Reactive             | 949     | 251     | 1.11 | 0.96 - 1.28         | 1.01  | 0.87 - 1.18         |          |  |
| Isocyanate           | 522     | 121     | 0.97 | 0.79 - 1.18         | 0.97  | 0.78 - 1.19         |          |  |
| Cleaning             | 554     | 162     | 1.23 | 1.03 - 1.46         | 1.04  | 0.86 - 1.25         |          |  |
| Wood                 | 1130    | 241     | 0.89 | 0.77 - 1.02         | 0.92  | 0.79 - 1.07         |          |  |
| Metals               | 1685    | 450     | 1.12 | 1.01 - 1.25         | 1.15  | 1.02 - 1.28         |          |  |
| Any Mixed            | 2327    | 477     | 0.85 | 0.76 - 0.94         | 0.90  | 0.81 - 1.00         |          |  |
| Metalworking         | 919     | 254     | 1.16 | 1.01 - 1.34         | 1.14  | 0.98 - 1.33         |          |  |
| Textile              | 89      | 22      | 1.03 | 0.65 - 1.65         | 0.90  | 0.56 - 1.46         |          |  |
| Agricultural         | 1319    | 201     | 0.63 | 0.54 - 0.73         | 0.71  | 0.61 - 0.84         |          |  |
| Irritant Peaks       | 808     | 201     | 1.04 | 0.89 - 1.22         | 1.11  | 0.94 - 1.30         |          |  |

<sup>a</sup> Adjusted for child's year of birth, child's sex, maternal age at birth, paternal age of birth, total income of parents, parity, highest parental education, history of parental psychiatric diagnosis prior to child's date of birth, urbanicity of birth place, paternal immigrant status, and maternal smoking. <sup>b</sup> 95% CI= 95% confidence interval. <sup>c</sup> HMW = High Molecular Weight. <sup>d</sup> LMW = Low Molecular Weight.
